# Supplementary material for: Association of Copy Number Variation Signature and Survival in Patients With Serous Ovarian Cancer
Source: PubMed Central journal article supplement (PMC8239953; doi:10.1001/jamanetworkopen.2021.14162), 2021-06-28
Supplement: jamanetwopen-e2114162-s001.pdf [file jamanetwopen-e2114162-s001.pdf]

## Supplemental Online Content

Graf RP, Eskander R, Brueggeman L, Stupack DG. Association of copy number variation signature and survival in patients with serous ovarian cancer. *JAMA Netw Open*. 2021;4(6):e2114162. doi:10.1001/jamanetworkopen.2021.14162

**eFigure 1.** Analysis Flowchart

**eFigure 2.** Association of Survival with Proportion of Genes with CNV

**eFigure 3.** CNV Plots and Clustered Regions by Risk Score Tercile

**eFigure 4.** Bootstrapping Internal Validation Comparison to LOOCV Internal Validation

**eFigure 5.** Alternate Cox PH Models

**eFigure 6.** Comparison of Risk Score to Genomic Scar Signatures

**eTable 1.** Comparison of LASSO-Chosen Features vs the Main Model Features and Performance

**eTable 2.** FDA-Approved Panel Reporter Approximations

**eTable 3.** How to Use Risk Score

This supplemental material has been provided by the authors to give readers additional information about their work.

## eFigure 1: Analysis Flowchart

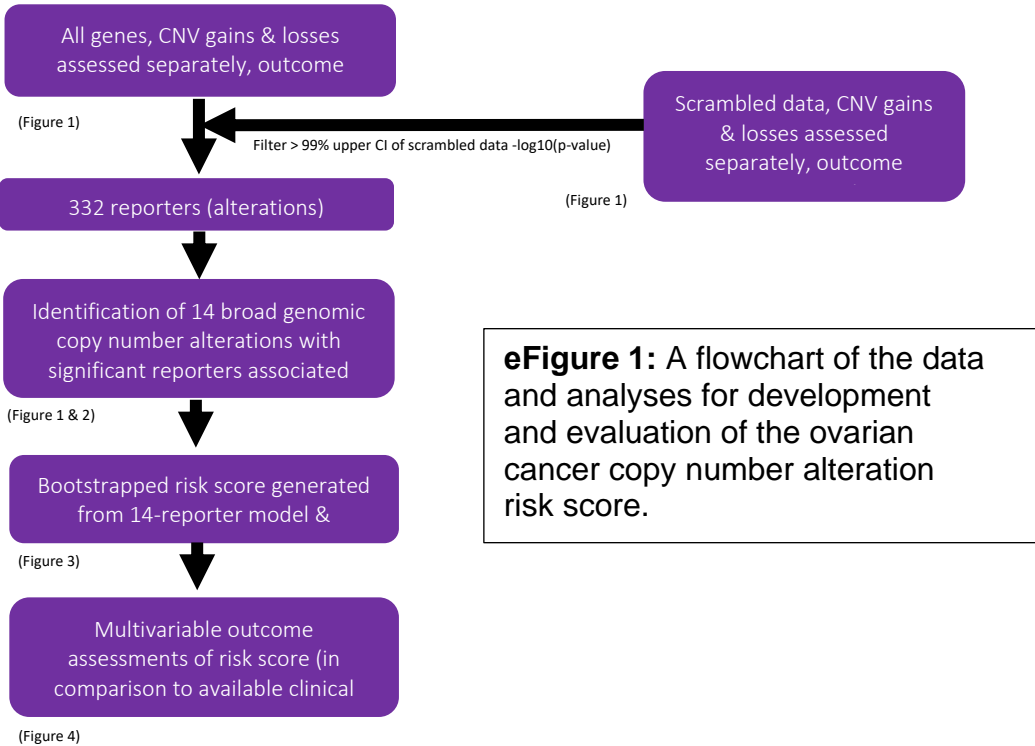

## eFigure 2:

### Association of Survival with Proportion of Genes with CNV

**A**

| Variable                     | N   | Hazard ratio | HR (95% CI)       | p-value |
|------------------------------|-----|--------------|-------------------|---------|
| % Altered (per 10% increase) | 564 |              | 1.01 (0.95, 1.07) | 0.7     |

**eFigure 2:** (A) Univariable Cox PH model evaluating the relationship between the % of genes in genome with copy number variations (GISTIC score not equal to 0) and overall survival.

(B) Kaplan-Meier estimations of overall survival by % of genes in genome with copy number variations, binned into tertiles.

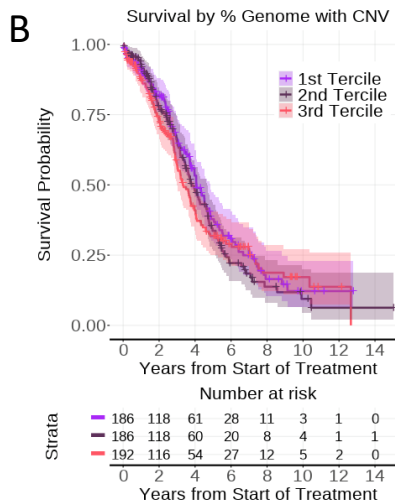

eFigure 3: CNV Plots and Clustered Regions by Risk Score Tercile

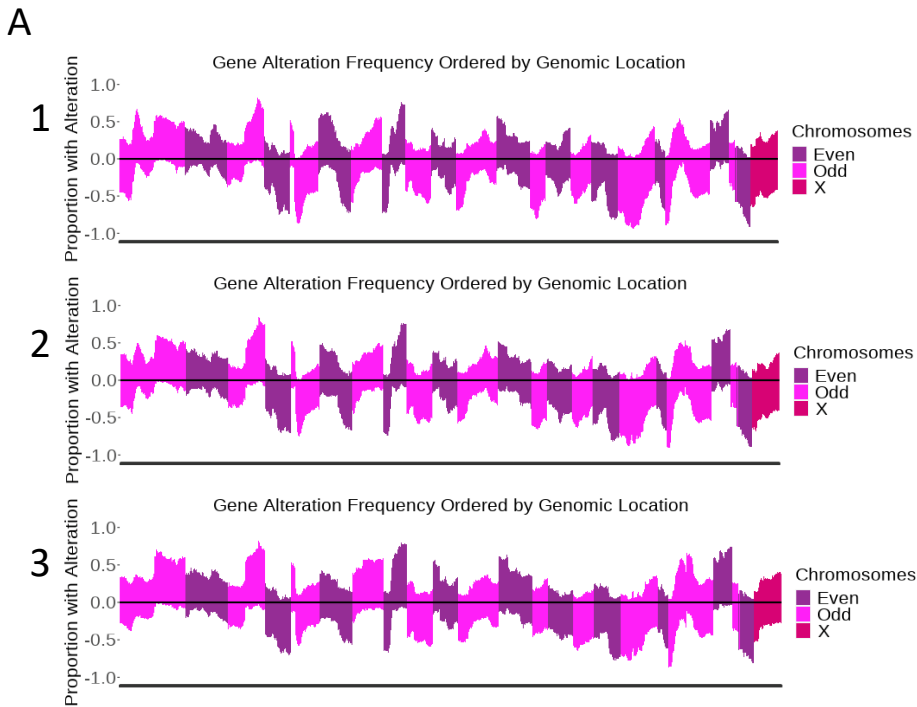

**B**

|       |      | TERCILE |      |      |
|-------|------|---------|------|------|
|       |      | 1       | 2    | 3    |
| 1p34  | gain | 0.67    | 0.49 | 0.36 |
| 3q26  | loss | 0       | 0    | 0.03 |
| 5q12  | gain | 0       | 0.01 | 0.11 |
| 5q22  | loss | 0.75    | 0.59 | 0.38 |
| 6p21  | gain | 0.6     | 0.42 | 0.3  |
| 7p21  | gain | 0.11    | 0.22 | 0.39 |
| 7p21  | loss | 0.58    | 0.43 | 0.24 |
| 7q11  | gain | 0.19    | 0.39 | 0.61 |
| 8q21  | gain | 0.39    | 0.54 | 0.71 |
| 13q14 | loss | 0.81    | 0.67 | 0.39 |
| 14q32 | gain | 0.39    | 0.16 | 0.09 |
| 17q12 | loss | 0.9     | 0.72 | 0.58 |
| 19p12 | loss | 0.05    | 0.21 | 0.34 |
| 19q13 | gain | 0.24    | 0.42 | 0.66 |

Poorer Outcome  
Improved Outcome

**eFigure 3:** Genomic alterations plots are shown (A) by first, second and third tertile (labeled 1, 2, 3). Frequency of gains (either GISTIC +1 or +2) indicated as the height above center line, frequency of losses (either GISTIC -1 or -2) indicated as depth below center line (negative values). Genes ordered by location in the genome. (B) The specific locations of clustered regions associated with survival included in the risk score and associated incidence of alteration within each tertile.

eFigure 4:  
Bootstrapping Internal Validation Comparison to LOOCV Internal  
Validation

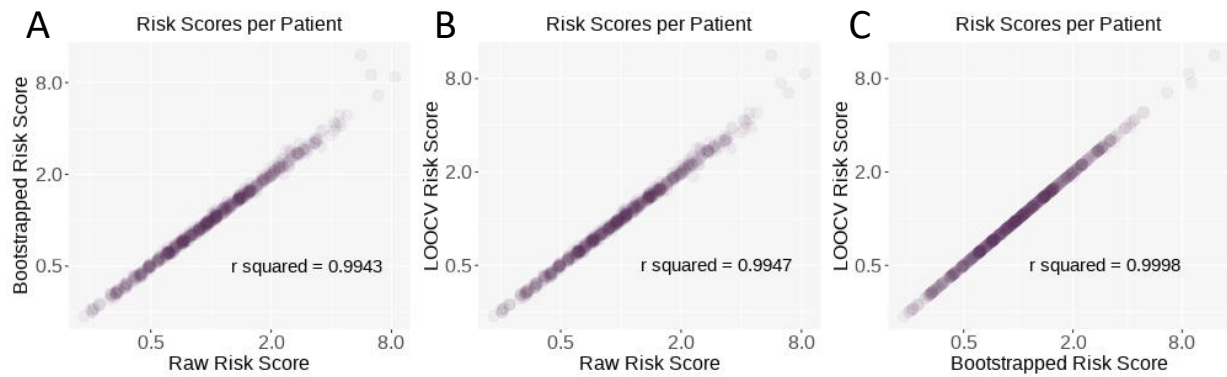

**eFigure 4:** Scatter plots comparing the risk score (A) raw vs. bootstrapped, (B) raw vs. leave one out cross-validation (LOOCV), and (C) bootstrapped vs. LOOCV. Coefficient of determination is shown from a linear model incorporating compared values per graph.

## eFigure 5: Alternate Cox PH Models

A

| Variable       | N       | Hazard ratio | HR (95% CI)       | p-value |
|----------------|---------|--------------|-------------------|---------|
| Clinical Stage | III 430 | ■            | Reference         |         |
|                | IV 84   | ■            | 1.51 (1.15, 1.99) | 0.003   |
| Age (tercile)  | 1st 162 | ■            | Reference         |         |
|                | 2nd 173 | ■            | 1.35 (1.01, 1.82) | 0.043   |
|                | 3rd 179 | ■            | 1.79 (1.34, 2.39) | <0.001  |
| Risk (tercile) | 1st 167 | ■            | Reference         |         |
|                | 2nd 169 | ■            | 1.62 (1.20, 2.17) | 0.001   |
|                | 3rd 178 | ■            | 2.99 (2.23, 4.00) | <0.001  |

### eFigure 5:

(A) Multivariable model as per Figure 4, with Stage I-II patients excluded and  
 (B) Figure 4 model comparisons with expanded features and continuous variables.

B

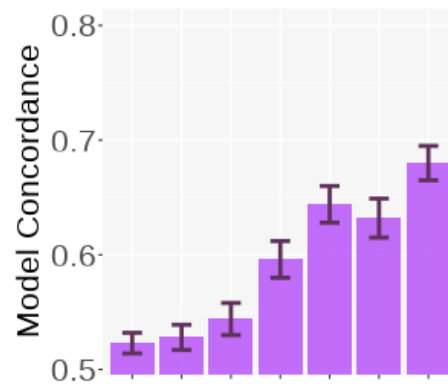

|                              |   |   |   |   |   |   |   |
|------------------------------|---|---|---|---|---|---|---|
| Race (white / black / Asian) | + |   |   |   |   | + | + |
| Grade (G1-&GX/G2/G2)         |   | + |   |   |   | + | + |
| Stage (I-II/III/IV)          |   |   | + |   |   | + | + |
| Age (Continuous)             |   |   |   | + |   | + | + |
| Risk (Continuous)            |   |   |   |   | + |   | + |

## eFigure 6: Comparison of Risk Score to *Genomic Scar* Signatures

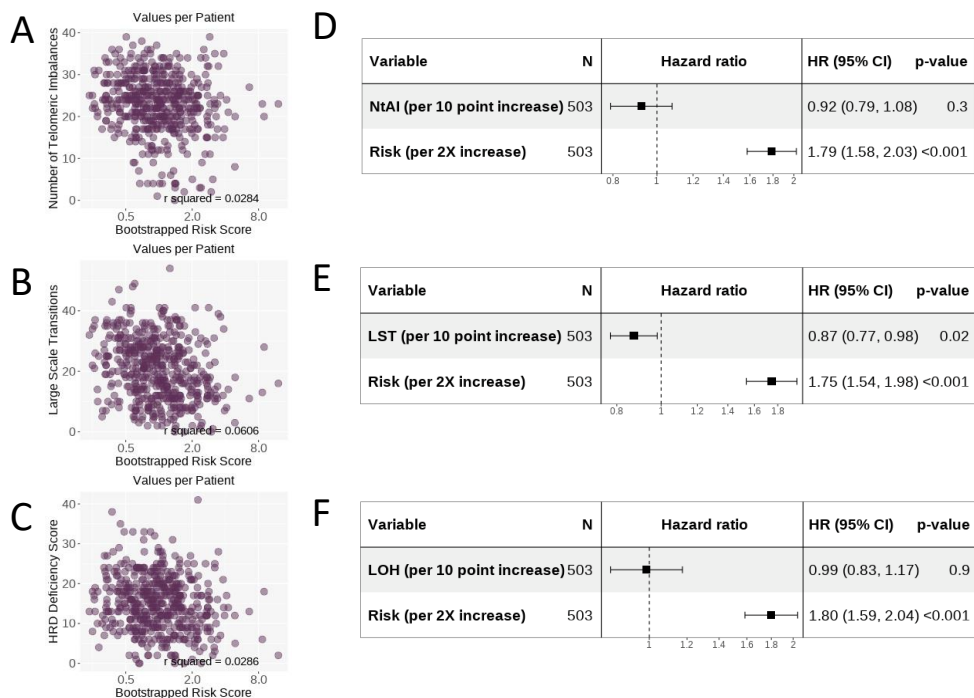

**eFigure 6:** Scatter plots showing relationship between Bootstrapped Risk Score and genomic scar signatures (A) Number of telomeric imbalances (NtAI), (B) large scale transitions (LST) and (C) homologous recombination deficiency score loss of heterozygosity (LOH). Multivariable models incorporating risk score and (D) NtAI, (E) LST, (F) LOH. NtAI, LST, and LOH values were obtained from reported supplementary data from Marquard et al 2015. Patients without reported values were excluded from analyses.

eTable 1:

Comparison of LASSO-chosen features vs. the main model features and performance

A

| Chromosome | Band | Alteration | Abs Coefficient | Reporter Chosen by LASSO Model |
|------------|------|------------|-----------------|--------------------------------|
| 8          | q21  | gain       | 0.0873          | RNA5SP273                      |
| 1          | p34  | gain       | 0.0818          | SCMH1                          |
| 19         | p13  | loss       | 0.0738          | RDH8                           |
| 7          | q11  | gain       | 0.0543          | TPST1                          |
| 5          | q23  | loss       | 0.0517          | DMXL1                          |
| 13         | q14  | loss       | 0.0410          | COG3                           |
| 7          | p21  | loss       | 0.0389          | RPA3                           |
| 19         | q13  | gain       | 0.0368          | ZNF585A                        |
| 6          | p21  | gain       | 0.0267          | CDKN1A                         |
| 5          | q22  | loss       | 0.0154          | SLC25A46                       |
| 6          | p22  | gain       | 0.0139          | RNA5SP205                      |
| 8          | q22  | gain       | 0.0014          | TRIQK                          |
| 7          | p22  | gain       | 0.0013          | ZDHHC4                         |
| 6          | q14  | loss       | 0.0001          | PGM3                           |

B

|                          | Main Cox Model | LASSO-chosen features in Cox Model |
|--------------------------|----------------|------------------------------------|
| Reporters                | 14             | 14                                 |
| Unadjusted concordance   | 0.662 (0.016)  | 0.655 (0.016)                      |
| Bootstrapped concordance | 0.644 (0.016)  | 0.634 (0.017)                      |
| LOOCV concordance        | 0.644 (0.016)  | 0.634 (0.017)                      |

**eTable 1:** (A) Top 14 reporters chosen by the LASSO model. Reporters in same regions chosen by main model are colored purple, and reporters identical to ones chosen in the main model are colored red. (B) comparison of main model vs. Cox model constructed with LASSO-chosen features: concordance, raw vs. internally validated. LOOCV = "leave on out cross-validation."

eTable 2: FDA-Approved Panel Reporter Approximations

| Chromosome                      | Contiguous Band | Alteration | Reporter used in CNV Risk Score model: | Closest Reporter: MSK-IMPACT | Closest Reporter: FoundationOne CDx |
|---------------------------------|-----------------|------------|----------------------------------------|------------------------------|-------------------------------------|
| 1                               | p34             | Gain       | SCMH1                                  | MYCL                         | MYCL                                |
| 3                               | q26             | Loss       | SAMD7                                  | PRKCI                        | PRKCI                               |
| 5                               | q12-13          | Gain       | CD180                                  | PIK3R1                       | PIK3R1                              |
| 5                               | q21-23          | Loss       | SLC25A46                               | APC                          | APC                                 |
| 6                               | p21             | Gain       | CDKN1A                                 | CDKN1A                       | CDKN1A                              |
| 7                               | p21-22          | Gain       | RPA3                                   | PMS2                         | PMS2                                |
| 7                               | p21-22          | Loss       | RPA3                                   | PMS2                         | PMS2                                |
| 7                               | q11             | Gain       | TPST1                                  | n/a                          | n/a                                 |
| 8                               | q21-22          | Gain       | TRIQQ                                  | NBN                          | NBN                                 |
| 13                              | q14             | Loss       | COG3                                   | CYSLTR2                      | RB1                                 |
| 14                              | q32             | Gain       | TCL6                                   | DICER1                       | n/a                                 |
| 17                              | q12             | Loss       | PPP1R1B                                | ERBB2                        | ERBB2                               |
| 19                              | p12-13          | Loss       | ZNF431                                 | DNMT1                        | SMARCA4                             |
| 19                              | q13             | Gain       | ZNF585B                                | AKT2                         | AKT2                                |
| Model bootstrapped concordance: |                 |            | 0.644<br>(0.014)                       | 0.623<br>(0.018)             | 0.626 (0.018)                       |

**eTable 2:** Table of regions with highest amount of significant reporters, associated reporter used in the base model, and the closest reporter in FDA-cleared panels, as well as the resulting within-TCGA internally validated concordance index from models with indicated reporters.



### eTable 3: How To Use Risk Score

A  $relative\ patient\ risk = e^{((\Sigma\ coefficients) - 0.323)}$

B

| Chr | Contiguous Band | Alteration | Reporter Gene | Coefficient |
|-----|-----------------|------------|---------------|-------------|
| 1   | p34             | Gain       | SCMH1         | -0.289      |
| 3   | q26             | Loss       | SAMD7         | 1.535       |
| 5   | q12-13          | Gain       | CD180         | 0.587       |
| 5   | q21-23          | Loss       | SLC25A46      | -0.281      |
| 6   | p21             | Gain       | CDKN1A        | -0.397      |
| 7   | q11             | Gain       | TPST1         | 0.392       |
| 7   | p21-22          | Gain       | RPA3          | 0.058       |
| 7   | p21-22          | Loss       | RPA3          | -0.199      |
| 8   | q21-22          | Gain       | TRIQQ         | 0.362       |
| 13  | q14             | Loss       | COG3          | -0.262      |
| 14  | q32             | Gain       | TCL6          | -0.378      |
| 17  | q12             | Loss       | PPP1R1B       | -0.261      |
| 19  | p12-13          | Loss       | ZNF431        | 0.470       |
| 19  | q13             | Gain       | ZNF585B       | 0.395       |

C

| Chr                                             | Contiguous Band | Alteration | Reporter Gene | Coefficient | Has alteration?<br>1 = yes, 0 = no | Coefficients to sum |
|-------------------------------------------------|-----------------|------------|---------------|-------------|------------------------------------|---------------------|
| 1                                               | p34             | Gain       | SCMH1         | -0.289      | 1                                  | -0.289              |
| 3                                               | q26             | Loss       | SAMD7         | 1.535       | 0                                  | 0                   |
| 5                                               | q12-13          | Gain       | CD180         | 0.587       | 1                                  | 0.587               |
| 5                                               | q21-23          | Loss       | SLC25A46      | -0.281      | 0                                  | 0                   |
| 6                                               | p21             | Gain       | CDKN1A        | -0.397      | 0                                  | 0                   |
| 7                                               | q11             | Gain       | TPST1         | 0.392       | 1                                  | 0.392               |
| 7                                               | p21-22          | Gain       | RPA3          | 0.058       | 0                                  | 0                   |
| 7                                               | p21-22          | Loss       | RPA3          | -0.199      | 0                                  | 0                   |
| 8                                               | q21-22          | Gain       | TRIQQ         | 0.362       | 1                                  | 0.362               |
| 13                                              | q14             | Loss       | COG3          | -0.262      | 1                                  | -0.262              |
| 14                                              | q32             | Gain       | TCL6          | -0.378      | 0                                  | 0                   |
| 17                                              | q12             | Loss       | PPP1R1B       | -0.261      | 0                                  | 0                   |
| 19                                              | p12-13          | Loss       | ZNF431        | 0.470       | 0                                  | 0                   |
| 19                                              | q13             | Gain       | ZNF585B       | 0.395       | 1                                  | 0.395               |
| Sum of coefficients for hypothetical Patient A: |                 |            |               |             |                                    | 1.185               |
| Relative patient risk:                          |                 |            |               |             | $e^{(0.203 - 1.185)}$              |                     |
| Relative patient risk:                          |                 |            |               |             | 2.67                               |                     |

D

| Tercile         | Risk Score   | Median Years OS (95% CI) |
|-----------------|--------------|--------------------------|
| 1 <sup>st</sup> | < 0.72       | 5.7 (4.7 - 7.4)          |
| 2 <sup>nd</sup> | 0.73 to 1.35 | 4.1 (3.7 - 4.8)          |
| 3 <sup>rd</sup> | > 1.36       | 2.9 (2.3 - 3.2)          |

**eTable 3:** (A) Relative patient risk equation. (B) Summary of final model components and coefficients, trained on the entire TCGA dataset. (C) Example application of risk score to hypothetical Patient A. Patient A has gain of SCMH1, gain of CD180, gain of TPST1, gain of TRIQQ, loss of COG3, gain of ZNF585B, but not the other indicated alterations in the model. Interpretation: Considering only copy number alterations, Patient A is anticipated to have a 2.67X higher likelihood of dying sooner than the average patient in the TCGA firehose database (if given similar treatment to patients contributing to the TCGA database). (D) Risk score ranges shown by tercile and OS for patients in TCGA cohort, for comparison.
